# Supplementary material for: Dual-energy fluorescent x-ray computed tomography system with a pinhole design: Use of K-edge discontinuity for scatter correction
Source: PubMed Central journal article supplement (PMC5341157; doi:10.1038/srep44143), 2017-03-08
Supplement: srep44143-s4.pdf [file srep44143-s4.pdf]

## Supplementary Information

Paper Title: Dual-energy fluorescent x-ray computed tomography with a pinhole design: use of K-edge discontinuity for scatter correction

Authors: Tenta Sasaya, Naoki Sunaguchi, Thet-Thet-Lwin, Kazuyuki Hyodo, Tsutomu Zeniya, Tohoru Takeda, Tetsuya Yuasa

### Video Legends

Visualization 1: Movie of volume rendering of blood vessels in the rat liver reconstructed using dual-energy FXCT.

Visualization 2: Movie of volume rendering of blood vessels in the rat liver reconstructed using mono-energy FXCT.

Visualization 3: Movie of volume rendering of blood vessels in the rat liver reconstructed using attenuation-contrast CT.
